# Supplementary material for: Spatiotemporal changes of eutrophication and heavy metal pollution in the inflow river system of Baiyangdian after the establishment of Xiongan New Area
Source: PeerJ. 2022 May 3;10:e13400. doi: 10.7717/peerj.13400 (PMC9074874; doi:10.7717/peerj.13400)
Supplement: Supplemental Information 1 [file peerj-10-13400-s001.docx]

| *WQI* of eutrophication | *WQI* of heavy metals | Description of water quality |
| --- | --- | --- |
| ≤0.8 | ≤1 | No pollution |
| 0.8<≤1 | 1<≤2 | Slight pollution |
| 1<≤2 | 2<≤3 | Moderate pollution |
| ≥2 | >3 | Serious pollution |
