# Supplementary material for: Spatiotemporal changes of eutrophication and heavy metal pollution in the inflow river system of Baiyangdian after the establishment of Xiongan New Area
Source: PeerJ. 2022 May 3;10:e13400. doi: 10.7717/peerj.13400 (PMC9074874; doi:10.7717/peerj.13400)
Supplement: Supplemental Information 5 [file peerj-10-13400-s005.xlsx]

## Sheet: Sheet1
Autumn
Site	distance to the estuary			NH4+（mg/L）	TP（mg/L）	COD（mg/L）		Pb（ug/L）	Cd（ug/L）	Cr（ug/L）
F12	-6.74795	surface	2-QB-H-B-1	1.2978	0.0169	2.5446		5.34143	1.30886	7.81907
			2-QB-H-B-2	0.851	0.0265	4.226		4.21972	1.2561	12.5523
			2-QB-H-B-3	0.9404	0.0195	3.8149		3.94219	1.38441	34.7566
			2-QB-H-B-4	0.7689	0.02875	0.857		3.6184	1.46603	14.2228
			2-Q-B-1	0.7963	0.0661	3.0186		16.822	3.34	22.5204
			2-Q-B-2	0.8265	0.0836	10.441		9.57274	3.352	21.6865
			2-Q-B-3	0.9034	0.0953	5.1138		6.24347	3.177	63.2757
			2-Q-B-4	0.666	0.0816	7.5028		9.30425	3.321	29.7807
			average	0.881288	0.0522813	4.68984		7.38302	2.32567	25.8268
		deep	2-Q-X-1	0.7264	0.1078	10.812		0.927366	3.445	12.4299
			2-Q-X-2	0.9998	0.1116	6.3101		8.0692	3.687	13.3068
			2-Q-X-3	0.7463	0.0987	7.9985		5.3843	3.226	8.81804
			2-Q-X-4	0.6347	0.0937	14.125		1.19586	3.2	12.3882
			2-QB-H-X-1	0.7889	0.0639	2.3204		3.65309	1.42882	12.6219
			2-QB-H-X-2	0.8576	0.0915	3.3632		5.72304	1.30127	11.253
			2-QB-H-X-3	0.9381	0.03695	3.731		2.5892	1.28723	100.001
			2-QB-H-X-4	0.8077	0.07555	7.7161		4.31224	1.26331	17.2855
			average	0.812438	0.0849625	7.04704		3.98179	2.35483	23.513
F11	-15.8913	surface	2-QB-Q-B-1	1.0846	0.0193	5.6875		5.67305	2.734	12.8806
			2-QB-Q-B-2	1.1635	0.0235	15.541		3.37113	1.758	7.85738
			2-QB-Q-B-3	1.4638	0.0213	7.2938			1.609	6.94221
			2-QB-Q-B-4	0.9248	0.0287	27.383			3.752	7.08457
			average	1.15918	0.0232	13.9763		4.52209	2.46325	8.69119
		deep	2-QB-Q-X-1	0.9065	0.036	13.333			3.219	7.71502
			2-QB-Q-X-2	0.9072	0.0291	11.377		6.14316	1.493	5.19323
			2-QB-Q-X-3	1.3013	0.0302	11.227		8.71358	2.768	9.19962
			2-QB-Q-X-4	0.9446	0.0297	10.279		7.74701	3.731	6.02705
			average	1.0149	0.03125	11.554		7.53458	2.80275	7.03373
F13	-9.45592	surface	2-D-B-1	1.1793	0.1319	6.8773		3.6184	1.30089	14.9421
			2-D-B-2	1.5646	0.1094	7.4588		4.18503	1.30013	9.79124
			2-D-B-3	0.8322	0.1091	6.2144		5.59527	2.33848	4.82602
			2-D-B-4	0.8754	0.1054	4.6709		4.43944	1.27432	5.8005
			average	1.11288	0.11395	6.30535		4.45953	1.55346	8.83996
		deep	2-D-X-1	1.5348	0.1298	11.464		3.42181	2.22649	5.45247
			2-D-X-2	0.9904	0.1301	11.469		6.41631	1.30355	2.99306
			2-D-X-3	1.2757	0.185	6.329		5.99394	2.32785	8.95597
			2-D-X-4	1.0344	0.3474	5.5406		2.62389	3.28571	8.00469
			average	1.20883	0.198075	8.70065		4.61399	2.2859	6.35155
F4	-60.1516	surface	2-CB-H-B-1	0.1096	0.0385	22.523		3.19053	1.26369	8.74715
			2-CB-H-B-2	0.0948	0.0489	7.5998		3.22522	1.24053	13.3412
			2-CB-H-B-3	0.1126	0.0436	9.5051		3.82655	1.29862	6.89099
			2-CB-H-B-4	0.1271	0.036	11.265		4.3238	1.3343	60.6732
			2-CB-Q-B-1	0.1745	0.0414	8.9936		5.7693	1.40111	10.8353
			2-CB-Q-B-2	0.169	0.0439	9.0254		4.06939	4.20347	7.74947
			2-CB-Q-B-3	0.17	0.0344	9.1346		5.0292	1.21548	8.37592
			2-CB-Q-B-4	0.1837	0.0371	4.2596		3.43337	1.39959	3.54991
			average	0.142663	0.040475	10.2883		4.10842	1.6696	15.0204
		deep	2-CB-Q-X-1	0.2571	0.0463	9.9097		2.11508	1.40946	2.76104
			2-CB-Q-X-2	0.2023	0.0413	5.764		4.18503	1.33316	28.4225
			2-CB-Q-X-3	0.1835	0.0354	12.946		4.78636	1.20333	3.71232
			2-CB-Q-X-4	0.1716	0.0392	8.2429		2.94768	1.28381	33.7589
			2-CB-H-X-1	0.3608	0.0397	12.516		3.46806	1.23294	14.5477
			2-CB-H-X-2	0.3459	0.0497	4.0292		4.23129	1.32215	33.8517
			2-CB-H-X-3	0.3211	0.0553	4.6632		4.0347	1.2747	39.4898
			2-CB-H-X-4	0.2736	0.0527	2.5046		5.20266	1.28874	13.9444
			average	0.264487	0.04495	7.57195		3.87136	1.29354	21.311
F10	-23.9455	surface	2-CN-Q-B-1	1.0966	0.0221	9.6551		4.01157	1.34417	7.33183
			2-CN-Q-B-2	0.7346	0.0216	12.084		4.26598	0.974319	26.2415
			2-CN-Q-B-3	0.9045	0.0209	11.686		4.95982	2.30621	10.4641
			2-CN-Q-B-4	0.5231	0.0221	21.671		13.6531	1.31836	59.4899
			average	0.8147	0.021675	13.774		6.72262	1.48576	25.8818
		deep	2-CN-Q-X-1	0.7225	0.0245	22.491		14.717	2.23712	9.97686
			2-CN-Q-X-2	1.1453	0.0361	17.415		23.3524	1.28874	9.00238
			2-CN-Q-X-3	0.9045	0.0281	4.2211		4.95982	3.38061	36.6824
			2-CN-Q-X-4	0.5106	0.0409	5.6994		13.3409	1.37416	8.51513
			average	0.820725	0.0324	12.4566		14.0925	2.07016	16.0442
F5	-51.1159	surface	2-CN-H-B-1	0.20245	0.0259	9.2956		1.69877	7.84478	32.2044
			2-CN-H-B-2	0.1726	0.023	14.589		2.99394	5.24628	15.3133
			2-CN-H-B-3	0.2111	0.019	15.552		2.27697	4.37581	10.1857
			2-CN-H-B-4	0.1508	0.0197	10.219		2.61233	2.37901	16.659
			average	0.184237	0.0219	12.4139		2.3955	4.96147	18.5906
		deep	2-CN-H-X-1	0.1633	0.0266	17.045		1.81441	1.77162	17.8191
			2-CN-H-X-2	0.1466	0.0391	10.501		1.81441	1.49146	27.5408
			2-CN-H-X-3	0.24435	0.0578	13.124		2.51982	1.42617	31.8331
			2-CN-H-X-4	0.1866	0.0385	15.751		32.0774	1.35897	11.601
			average	0.185213	0.0405	14.1052		9.55651	1.51206	22.1985
F9	-30.4455	surface	2-W-B-1	0.7201	0.1358	5.1412			4.047	11.4367
			2-W-B-2	1.0156	0.1477	6.3579		0.45	4.054	14.1212
			2-W-B-3	1.0435	0.1444	10.034		1.46435	1.96	31.4483
			2-W-B-4	1.0178	0.2237	11.388			4.249	12.5145
			average	0.94925	0.1629	8.23028		0.957173	3.5775	17.3802
		deep	2-W-X-1	0.6396	0.2755	7.1011			4.141	36.3698
			2-W-X-2	1.2477	0.3635	7.8873			2.408	22.2356
			2-W-X-3	1.0284	0.5988	6.5037		2.6457	4.304	9.52501
			2-W-X-4	0.5211	0.1786	9.2935		16.2313	4.24	32.8922
			average	0.8592	0.3541	7.6964		9.4385	3.77325	25.2557
F7	-42.1928	surface	2-M-B-1	1.5313	0.1841	10.202		8.39139	1.564	18.5082
			2-M-B-2	1.0322	0.2002	9.7656		9.35795	1.0368	15.661
			2-M-B-3	1.2408	0.22	6.3172		5.97498	0.9345	15.4983
			2-M-B-4	0.9455	0.1992	11.191		4.25664	1.8938	9.13861
			average	1.18745	0.200875	9.36895		6.99524	1.35728	14.7015
		deep	2-M-X-1	2.0394	0.2346	8.1326		14.7936	2.104	28.8336
			2-M-X-2	1.6316	0.6223	27.618		9.68014	1.7791	27.1456
			2-M-X-3	2.1762	0.2182	22.0832		10.6791	1.3781	19.0166
			2-M-X-4	1.1975	0.2283	29.531		6.02868	1.6455	16.1287
			average	1.76118	0.32585	21.8412		10.2954	1.72667	22.7811
F3	-61.7039	surface	2-FJ-B-1	0.1951	0.0195	4.0126		5.22929	0.2625	9.01658
			2-FJ-B-2	0.1243	0.0101	1.6716		6.40456	0.4738	6.00671
			2-FJ-B-3	0.5496	0.0104	1.1008		4.45117	0.4181	6.35244
			2-FJ-B-4	0.146	0.0221			9.84123	0.3181	8.2031
			average	0.25375	0.015525	2.26167		6.48156	0.368125	7.39471
		deep	2-FJ-X-1	0.1886	0.0096	1.4726		5.12898	0.4641	6.29143
			2-FJ-X-2	0.5671	0.0228	2.2913		3.24955	0.6579	5.72199
			2-FJ-X-3	0.0833	0.0062	0.6616		5.96281	0.5656	2.83414
			2-FJ-X-4	0.0446	0.0142	3.0452		6.83415	0.4448	2.83414
			average	0.2209	0.0132	1.86767		5.29387	0.5331	4.42042
F6	-42.1781	surface	2-B-B-1	0.2595	0.0994	8.8668		5.4917	0.982	8.71153
			2-B-B-2	0.2569	0.0703	17.098		14.6204	0.9407	8.38614
			2-B-B-3	0.2164	0.0785	11.242		8.39139	1.8589	1.53257
			2-B-B-4	0.3598	0.0859	15.796		7.63962	1.9034	14.6441
			average	0.27315	0.083525	13.2507		9.03576	1.42125	8.31859
		deep	2-B-X-1	0.315	0.0851	14.608		16.4583	1.4827	4.82716
			2-B-X-2	0.3668	0.0995	16.573		10.5393	1.6263	16.8405
			2-B-X-3	0.4374	0.344	8.7703			1.5454	8.87422
			2-B-X-4	0.4395	0.7042	34.305		12.7409	2.126	11.4163
			average	0.389675	0.3082	18.5641		13.2462	1.6951	10.4896
F8	-41.812	surface	2-S-B-1	0.1763	0.0426	8.3602		10.6791	1.096	8.67085
			2-S-B-2	0.3689	0.0624	9.923		19.9902	1.392	8.2031
			2-S-B-3	0.2507	0.0625	7.5818		4.94185	0.6192	7.95906
			2-S-B-4	0.157	0.074	4.6668		8.1155	2.669	17.3693
			average	0.238225	0.060375	7.63295		10.9317	1.44405	10.5506
		deep	2-S-X-1	0.3978	0.0525	6.0632		7.58592	1.669	9.54535
			2-S-X-2	0.2918	0.1183	4.9024		9.592	1.054	9.21995
			2-S-X-3	0.4017	0.0588	2.426		7.58592	2.683	18.7115
			2-S-X-4	0.1478	0.0725	5.4226			2.551	17.2676
			average	0.309775	0.075525	4.70355		8.25461	1.98925	13.6861
F1	-62.5034	surface	2-BJ-B-1	0.1462	0.0128	2.5972		5.4917	0.256	5.2339
			2-BJ-B-2	0.0599	0.0056	3.5944		9.51905	0.4004	7.8167
			2-BJ-B-3	0.208	0.0025	1.7037		6.99524	0.4504	3.97301
			2-BJ-B-4	0.2955	0.0195	1.1804		4.41774	0.347	7.02356
			average	0.1774	0.0101	2.26892		6.60593	0.36345	6.01179
		deep	2-BJ-X-1	0.0872	0.0492	2.0233		8.92837	0.3088	5.98637
			2-BJ-X-2	0.1593	0.0409	2.3841		2.1219	0.6454	14.1618
			2-BJ-X-3	0.4268	0.0569	2.3641		3.02159	0.4118	6.00671
			2-BJ-X-4	0.2239	0.0213	3.6734		1.57174	0.6517	7.20659
			average	0.2243	0.042075	2.61123		3.9109	0.504425	8.34038
F14	0	surface	QJ-Z-B-1	1.1793	0.1319	6.8773		5.1696	0.982	7.11529
			QJ-Z-B-2	1.4646	0.1094	7.4588		12.6204	1.0407	9.3137
			QJ-Z-B-3	0.8322	0.2091	6.2144		8.1388	0.9589	13.2568
			QJ-Z-B-4	0.9754	0.1054	9.6709		6.63962	1.7034	14.129
			average	1.11287	0.13895	7.55535		8.14209	1.17125	10.9537
		deep	QJ-Z-X-1	1.5348	0.2298	11.464		16.826	1.5827	7.162
			QJ-Z-X-2	0.9904	0.1301	11.469		9.53931	1.3263	16.8405
			QJ-Z-X-3	1.2757	0.185	6.329		7.4291	1.54	8.87422
			QJ-Z-X-4	1.1344	0.3474	7.5406		12.0926	2.66	11.635
			average	1.23382	0.223075	9.20065		11.4718	1.77725	11.1279
F2	-64.516	surface	2-QR-B-1	0.0575	0.0104	2.9612		3.12898	0.7004	5.21357
			2-QR-B-2	0.0827	0.004	3.6411		3.66596	0.6051	4.09503
			2-QR-B-3	1.00095	0.0064	2.8532		4.41774	0.5006	7.36929
			2-QR-B-4	0.3174	0.0054	4.3825			0.6578	4.74581
			average	0.364638	0.00655	3.4595		3.73756	0.615975	5.35592
		deep	2-QR-X-1	0.4165	0.0214	8.5739		4.73992	0.9572	6.31176
			2-QR-X-2	0.1639	0.0129	3.9589		8.60618	0.7302	6.25075
			2-QR-X-3	0.1246	0.0122	2.3299		8.49878	0.51342	3.42391
			2-QR-X-4	0.1492	0.0187	3.3701		13.4532	0.7026	7.75569
			average	0.21355	0.0163	4.5582		8.82452	0.725855	5.93553
Summer
Site	distance to the estuary			NH4+（mg/L）	TP（mg/L）	COD(mg/L)		Pb（ug/L）	Cd（ug/L）	Cr（ug/L）
F4	-60.1516	surface	CB-Q-B-1	2.244	0.0655	4.2632		14.82	0.0385632	8.176
			CB-Q-B-2	2.2947	0.0615	5.8876		17.61	1.05085	15.63
			CB-Q-B-3	2.1591	0.0579			16.2	1.36257	10.27
			CB-Q-B-4	2.08054	0.0596			14.24	0.832322	13.03
			CB-Z-B-1	2.2953	0.072	5.8794		17.9	0.253874	14.59
			CB-Z-B-2	2.3797	0.0769	3.6886		15.47	1.68714	7.97
			CB-Z-B-3	2.4517	0.0787			16.57	1.25973	7.103
			CB-Z-B-4	2.48652	0.0847			20.0945	1.03799	9.297
			average	2.29895	0.0696	4.9297		16.6131	0.94038	10.7582
		deep	CB-Q-X-1	2.1686	0.072	5.30165		15.72	0.514176	8.059
			CB-Q-X-2	2.1762	0.068	3.6198		15.52	1.57466	6.127
			CB-Q-X-3	2.348	0.1117			15.44	1.28865	9.964
			CB-Q-X-4	2.23185	0.1126			17.11	1.47826	7.611
			average	2.23116	0.091075	4.46073		15.9475	1.21394	7.94025
F2	-64.516	surface	CB-H-B-1	2.5049	0.0717	19.8018		7.29	0.924195	5.764
			CB-H-B-2	2.5841	0.0589	3.7464		6.35	1.58034	11.812
			CB-H-B-3	0.7597	0.07985			9.23	0.694138	3.736
			CB-H-B-4	2.56934	0.0706			10.152	1.37278	6.112
			average	2.10451	0.0702625	11.7741		8.2555	1.14286	6.856
		deep	CB-H-X-1	3.5999	0.0599	13.1214		4.99	0.906235	3.68
			CB-H-X-2	1.5883	0.0708	6.9399		5.55	0.994894	10.768
			CB-H-X-3	3.5104	0.0952	5		11.45	0.896594	10.832
			CB-H-X-4	2.38408	0.0689			15.35	1.74783	3.649
			CB-Z-X-1	2.4647	0.0716	2.3608		8.32	0.92873	5.15
			CB-Z-X-2	1.5152	0.0738	5.5614		9.08	0.725703	7.31
			CB-Z-X-3	2.3836	0.0601			9.08	0.726274	8.884
			CB-Z-X-4	1.44492	0.0773			9.73	1.53421	10.0549
			average	2.36139	0.0722	6.5967		9.19375	1.05756	7.54099
F5	-51.1159	surface	CN-Q-B-1	2.1559	0.0747	4.3909		17.6915	0.905511	17.2952
			CN-Q-B-2	2.5525	0.0803	4.5884		20.8524	0.363137	7.546
			CN-Q-B-3	2.4128	0.0788			15.83	0.308506	3.698
			CN-Q-B-4	2.28302	0.0704			16.52	1.24688	4.697
			CN-Z-B-1	2.3947	0.0751	4.1311		17.22	1.27259	15.09
			CN-Z-B-2	2.3979	0.0644	3.8715		16.11	0.92533	7.485
			CN-Z-B-3	2.348	0.078			16.19	1.28601	7.839
			CN-Z-B-4	2.43458	0.0721			15.96	0.224952	98.1
			average	2.37242	0.074225	4.24547		17.0467	0.816614	20.2188
		deep	CN-Q-X-1	2.5251	0.0779	3.5312		15.23	0.83875	18.8
			CN-Q-X-2	2.6258	0.0893	7.0229		22.6661	0.793759	5.869
			CN-Q-X-3	2.5944	0.0909			22.95	1.52646	8.889
			CN-Q-X-4	2.54835	0.0847			15.71	0.886954	12.2
			平均值	2.57341	0.0857	5.27705		19.139	1.01148	11.4395
			average
F10	-23.9455	deep	CN-Z-X-1	2.4295	0.0977	5.2154		16.63	1.34328	10.43
			CN-Z-X-2	2.5341	0.0829	5.8361		16.08	1.04763	12.78
			CN-Z-X-3	3.1542	0.0712			16.19	0.491681	6.96
			CN-Z-X-4	3.03373	0.0835			19.9534	1.17032	17.77
			CN-H-X-1	2.2882	0.0864	7.3555		15.07	1.07391	6.951
			CN-H-X-2	2.1681	0.0721	6.8492		16.3	0.925709	28.08
			CN-H-X-3	2.3851	0.0757			21.1399	0.523817	23.08
			CN-H-X-4	2.28768	0.0856			19.1328	2.52589	9.819
			average	2.53507	0.0818875	6.31405		17.562	1.13778	14.4838
		surface	CN-H-B-1	2.234	0.0805	3.11745		20.2931	1.35992	5.534
			CN-H-B-2	2.3683	0.0744	4.9012		16.78	0.440263	6.811
			CN-H-B-3	2.4123	0.0847			21.6939	1.28601	46.909
			CN-H-B-4	2.32364	0.0754			19.5039	1.34064	35.915
			average	2.33456	0.07875	4.00933		19.5677	1.10671	23.7922
F12	-6.74795	surface	QB-Q-B-1	5.8038	0.1539	5.21		16.24	0.510962	12.17
			QB-Q-B-2	5.8023	0.1549	3.0101		15.5		5.533
			QB-Q-B-3	5.6749	0.1711			15.92	0.138185	3.517
			QB-Q-B-4	5.8825	0.1476			15.83	0.912662	3.01
			QB-Z-B-1	5.7287	0.1616	5.6517		15.61		6.866
			QB-Z-B-2	5.764	0.1467	3.0291		17.03	0.604157	16.07
			QB-Z-B-3	5.4543	0.1558			16.04	0.703778	0.0308
			QB-Z-B-4	5.79031	0.1449			15.92	0.498108	7.57
			QB-H-B-1	5.1638	0.1357	4.4093		15.26	1.34328	8.723
			QB-H-B-2	5.786	0.1749	4.558		15.83	1.03157	6.707
			QB-H-B-3	5.4598	0.1483			15.36	0.157466	6.714
			QB-H-B-4	5.44964	0.1437			15.32	0.617011	0.1294
			average	5.64667	0.153258	4.31137		15.8217	0.651718	6.42002
		deep	QB-H-X-1	5.6877	0.1541	3.8454		15.8	0.224952	6.573
			QB-H-X-2	5.3914	0.1437	1.41595		15.96	3.11719	10.49
			QB-H-X-3	5.5452	0.1854			15.76	0.311719	0.0464
			QB-H-X-4	5.62573	0.149			16.09	0.819468	5.145
			QB-Q-X-1	5.3898	0.1613	7.3027		15.65	0.0610584	0.0627
			QB-Q-X-2	5.8464	0.148	4.7206		15.71		0.0386
			QB-Q-X-3	5.6059	0.1462			15.91	1.63894	0.0381
			QB-Q-X-4	5.56001	0.1178			15.16	0.392059
			QB-Z-X-1	5.7464	0.1485	1.3267		15.89	0.417768	9.902
			QB-Z-X-2	5.5625	0.1292	1.0755		15.51	0.706992	5.487
			QB-Z-X-3	5.7269	0.1369			16.21	0.485254	0.0586
			QB-Z-X-4	5.72048	0.1272			16.42	0.668429	0.0307
			average	5.61737	0.145608	3.28114		15.8392	0.803984	3.44292
F13	-9.45592	surface	Q-B-1	5.3191	0.1147	7.1883		8.223	0.9033	13.1799
			Q-B-2	5.56	0.173	3.8009		8.113	0.939	8.22641
			Q-B-3	5.1264		5.5133		7.479	0.9886	10.482
			Q-B-4	4.6832	0.4538	2.7539		8.725	0.924	7.69567
			average	5.17217	0.247167	4.8141		8.135	0.938725	9.89602
		deep	Q-X-1	5.7002	0.3382	5.6347		9.203	0.9212	9.02251
			Q-X-2	5.7371	0.9845	6.9178		8.37	0.8416	7.87258
			Q-X-3	5.1488	0.3285	3.5663		8.445	0.9402	11.3224
			Q-X-4	5.3857	0.279	5.2236		8.51	0.8527	10.3494
			average	5.49295	0.48255	5.3356		8.632	0.888925	9.6417
F14	0	surface	QJ-Q-B-1	5.5443	0.1423	5.6478		7.08		5.066
			QJ-Q-B-2	5.595	0.1437	4.9641		15.4	0.408127
			QJ-Q-B-3	5.4695	0.1463			25.36	0.192816	4.412
			QJ-Q-B-4	5.57198	0.1374			10.86		4.855
			QJ-Z-B-1	5.4646	0.1268	4.2416		15.81		7.115
			QJ-Z-B-2	5.3768	0.1343	3.6406		15.58		11.37
			QJ-Z-B-3	5.3967	0.1537			16.25	0.780905	7.019
			QJ-Z-B-4	5.35351	0.1266			6.63	0.260302
			QJ-H-B-1	5.3949	0.1467	6.0249
			QJ-H-B-2	5.352	0.1247	4.9973		6.72	0.404914	7.952
			QJ-H-B-3	5.2304	0.1402			20.67	0.141398	10.61
			QJ-H-B-4	5.32254	0.1403			16	0.507749	5.634
			average	5.42269	0.138583	4.91938		14.2145	0.385173	7.11478
		deep	QJ-H-X-1	5.3997	0.1367	0.8706		30.82	0.253874	6.887
			QJ-H-X-2	5.4498	0.1276	5.1282		25.83	0.915876	5.995
			QJ-H-X-3	5.3082	0.1295			6.91	0.465972	4.969
			QJ-H-X-4	5.57215	0.1265			16.8	0.224952	3.107
			QJ-Q-X-1	5.5016	0.139	3.7923		15.64		8.444
			QJ-Q-X-2	5.7682	0.1411	1.9691		25.35	0.0835536	6.024
			QJ-Q-X-3	5.5817	0.133			6.37	0.218525	8.18
			QJ-Q-X-4	5.505	0.1467			10.32	2.12098	6.917
			QJ-Z-X-1	5.4161	0.1431	5.4336		10.92	1.49754	5.283
			QJ-Z-X-2	5.4045	0.1455	4.454		25.42	0.305292	3.455
			QJ-Z-X-3	5.1998	0.1591			16.15	1.52967	3.49
			QJ-Z-X-4	5.46236	0.1342			20.73	0.864458	2.422
			average	5.46409	0.1385	3.60797		17.605	0.770972	5.43108
F8	-41.812	surface	B-B-1	1.9166	0.112	27.5		8.805	1.3577	14.9491
			B-B-2	2.9843	0.75	36.1		10.781	1.284	7.64908
			B-B-3	1.9447	0.112	13.4		9.506	1.9134	13.2286
			B-B-4	2.9221	0.221	33.6		8.116	2.0694	9.02326
			average	2.44192	0.29875	27.65		9.302	1.65613	11.2125
		deep	B-X-1	4.077	0.261	12.5		9.575	1.3785	41.9724
			B-X-2	3.0444	0.394	26.3		11.438	1.9535	13.3126
			B-X-3	2.8815	0.085	25.5		9.825	1.7237	8.93406
			B-X-4	3.847	0.526	28.1		10.266	2.1984	9.28788
			average	3.46247	0.3165	23.1		10.276	1.81352	18.3767
F11	-15.8913	surface	D-B-1	3.6068	0.0855	1.0438		8.755	1.092	35.6035
			D-B-2	3.6013	0.0887	3.6456		8.316	0.9952	10.0398
			D-B-3	3.614	0.089	3.7191		8.878	1.016	13.6665
			D-B-4	3.6045	0.0937	11.942		7.61	1.022	18.0008
			average	3.60665	0.089225	5.08763		8.38975	1.0313	19.3276
		deep	D-X-1	3.591	0.0768	14.958		8.123	0.9901	9.77439
			D-X-2	3.6396	0.0769	14.592		7.288	1.006	8.97828
			D-X-3	3.6005	0.0947	4.0567		8.593	0.9035	23.2197
			D-X-4	3.5572	0.0754	4.0905		7.483	0.8191	11.1455
			average	3.59708	0.08095	9.4243		7.87175	0.929675	13.2795
F7	-42.1928	surface	FJ-B-1	4.3685	0.1752	10.0055		8.279	1.6267	8.66869
			FJ-B-2	4.3217	0.1703	23.1597		15.99	1.7975	10.7474
			FJ-B-3	3.5545	0.164	13.9429		9.033	4.1516	37.5188
			FJ-B-4	3.265	0.2035	13.5639		8.693	1.9565	8.27064
			average	3.87743	0.17825	15.168		10.4987	2.38307	16.3014
		deep	FJ-X-1	3.4674	0.2175	12.9422		10.448	3.318	20.4865
			FJ-X-2	2.6996	0.2433	20.7454		8.856	2.83	27.1207
			FJ-X-3	4.5713	0.2034	26.8965		9.124	2.9357	52.4544
			FJ-X-4	3.2118	0.151	9.9666		8.324	3.0872	19.7744
			average	3.48752	0.2038	17.6377		9.188	3.04272	29.959
F3	-61.7039	surface	M-B-1	0.7745	0.0911	1.115		8.46	1.033	10.2047
			M-B-2	1.7259	0.0833	2.1717		10.313	2.124	10.0353
			M-B-3	2.6684	0.10794	9.9373		8.274	1.819	17.8681
			M-B-4	1.6114	0.10789	3.665		6.628	1.092	9.72569
			average	1.69505	0.0975575	4.22225		8.41875	1.517	11.9584
		deep	M-X-1	1.5763	0.1039	7.085		8.421	1.376	17.6912
			M-X-2	2.5145	0.139	9.6609		10.275	1.582	13.7947
			M-X-3	1.6761	0.129	8.6439		10.178	0.46	13.2729
			M-X-4	2.5763	0.162	5.1236		9.547	1.688	16.7624
			average	2.0858	0.133475	7.62835		9.60525	1.2765	15.3803
F1	-62.5034	surface	QR-B-1	0.0285	0.0039	4.1355		8.385	1.1802	20.9462
			QR-B-2	0.0825	0.0056	1.8451		9.6	0.8963	5.34264
			QR-B-3	0.5563	0.0422	3.9033		10.45	0.6666	8.22194
			QR-B-4	0.4691	0.0472	3.3204		8.33	0.8228	11.1455
			average	0.2841	0.024725	3.30107		9.19125	0.891475	11.4141
		deep	QR-X-1	0.3454	0.0602	4.5748		7.12	1.0428	11.7204
			QR-X-2	0.4234	0.0319	5.5932		10.69	1.2335	13.0623
			QR-X-3	0.0773	0.0035	3.1444		10.93	1.3447	7.96104
			QR-X-4	0.2702	0.0264	5.5748		12.658	0.9043	6.23615
			average	0.279075	0.0305	4.7218		10.3495	1.13132	9.74497
F6	-42.1781	surface	S-B-1	0.5849	0.0367	15.264		7.637	1.6477	9.77439
			S-B-2	0.6372	0.0439	22.359		9.532	1.399	9.68593
			S-B-3	0.7141	0.042	4.8504		8.853	1.145	17.3418
			S-B-4	0.891	0.0619	5.5034		12.754	0.9182	27.961
			average	0.7068	0.046125	11.9942		9.694	1.27747	16.1908
		deep	S-X-1	0.9043	0.0436	12.718		9.194	1.18	27.5188
			S-X-2	1.0637	0.0368	5.59		9.347	1.233	28.8898
			S-X-3	0.8211	0.0722	11.671		18.997	1.5555	16.0592
			S-X-4	1.3756	0.089	16.336		15.871	1.041	15.5727
			average	1.04117	0.0604	11.5787		13.3522	1.25238	22.0101
F9	-30.4455	surface	W-B-1	2.3175	0.058	3.8668		7.338	2.271	16.7182
			W-B-2	2.2553	0.0613	1.9826		7.617	2.122	8.93406
			W-B-3	2.3419	0.0583	14.281		8.064	3.6462	9.24365
			W-B-4	2.2832	0.0589	1.1645		8.291	2.259	6.14769
			average	2.29948	0.059125	5.32373		7.8275	2.57455	10.2609
		deep	W-X-1	2.2492	0.062	5.5419		7.785	8.32	19.9026
			W-X-2	2.2191	0.0627	2.1269		8.722	6.79	10.7474
			W-X-3	2.2433	0.0753	15.299		7.873	8.595	12.3396
			W-X-4	2.3045	0.0616	16.865		8.633	9.0325	13.9318
			average	2.25403	0.0654	9.9582		8.25325	8.18437	14.2304
Spring
site	distance to the estuary			CH4+ mg/l	TP mg/l	COD mg/l		Pb	Cd	Cr
F14	0	surface	Q-B-1					14.99
			Q-B-2	1.2394	0.0641	86.072		15.55	3.02455	5.473
			Q-B-3	0.1361	0.0723	26.303		7.45	1.13285	12.977
			Q-B-4	0.5804	0.0701	11.984		25.35	8.74657
			Q-B-5	0.3881	0.0647	26.942		9.364	5.75018
			average	0.586	0.0678	37.8252		14.5408	4.66354	9.225
		deep	Q-X-1	0.2689	0.0611	15.287		16	7.84404	9.53
			Q-X-2	0.3021	0.0631	14.176		9.82	3.51191	11.667
			Q-X-3	0.2703	0.069	33.849		25.83	1.49386
			Q-X-4	0.2232	0.1368	5.0244		16.91	4.12563
			Q-X-5	0.3464	0.0651	44.066		26.8	2.88736
			average	0.28218	0.07902	22.4805		19.072	3.97256	10.5985
F9	-30.4455	surface	A-B-1	0.8225	0.0627			23.04	3.38556	8.37
			A-B-2	0.8048	0.0765	13.754		14.92	3.98123	12.08
			A-B-3	1.0192	0.0797	8.5311		13.89		18.218
			A-B-4	0.8501	0.0612			5.51		18.25
			A-B-5	0.938	0.0822	34.813		6.21	3.54801
			average	0.88692	0.07246	19.0327		12.714	3.63827	14.2295
		deep	A-X-1	0.9389	0.0616	19.043		24.26
			A-X-2	0.8426	0.1337	25.443		23.83	9.65993
			A-X-3	0.8752	0.1091	19.043		5.36	7.66354	26.779
			A-X-4	0.9334	0.0956	4.9748		6.32
			A-X-5	0.7699	0.0574			25.8		36.34
			average	0.872	0.09148	17.1259		17.114	8.66173	31.5595
F11	-15.8913	surface	B-B-1	0.3497	0.0712	5.632		14.71		3.353
			B-B-2	0.439	0.0758	165.18		15.91	3.94513	6.476
			B-B-3	0.3909	0.0679	135.67		14.16	6.72491	2.068
			B-B-4	0.3336	0.0787	232.23		6.61		3.6
			B-B-5	0.4222	0.0741	42.355		23.03		2.649
			average	0.38708	0.07354	116.213		14.884	5.33502	3.6292
		deep	B-X-1	0.1859	0.0747	125.33		6.37
			B-X-2	0.2848	0.0681	15.442		16.32
			B-X-3	0.1486	0.0815	22.714		15.81		1.422
			B-X-4	0.3732	0.0821	30.502		25.58	7.80794	3.491
			B-X-5	0.3856	0.0766			16.25	2.60939	1.626
			average	0.27562	0.0766	48.497		16.066	5.20866	2.17967
F8	-41.812	surface	D-B-1	0.4091		33.718		24.52		9.278
			D-B-2	0.3379	0.0611	12.971		16.44	1.56245	16.39
			D-B-3	0.4408	0.099	28.099		7.11	4.11841	8.31
			D-B-4	1.2131	0.0721	5.7147		7.9	8.06065
			D-B-5	0.7814	0.1279			15.47	6.68881	2.357
			average	0.63646	0.090025	20.1257		14.288	5.10758	9.08375
		deep	D-X-1	2.2831	0.3682	15.528		24.82	7.84404	6.14
			D-X-2	0.62777	0.0918	16.254		7.61	9.7213	4.453
			D-X-3	0.9409	0.1271	47.51		16.2	3.01011	4.19
			D-X-4	0.9105	0.837	8.8421		14.24	2.73935	6.143
			D-X-5	1.3525	0.2415	14.079		25.72
			average	1.22295	0.33312	20.4426		17.718	5.8287	5.2315
F7	-42.1928	surface	M-B-1	0.0855	0.0533			22.95	3.62022	12.212
			M-B-2	0.0667	0.0754	30.273		18.71		0.688
			M-B-3	0.3975	0.0722	15.725		17.22	9.04982
			M-B-4	0.2416	0.0632			20.11	6.88736	4.229
			M-B-5	7.437	1.5509	56.375		16.19		64
			average	1.64566	0.363	34.1243		19.036	6.51913	20.2823
		deep	M-X-1	0.5281	0.305			19.96	0.804332
			M-X-2	0.2852	0.0586	3.7761		17.06	1.81516	6.175
			M-X-3	0.1459	0.0753	15.321		16.63	3.90903
			M-X-4	0.4918	0.0855	44.46		18.08	2.32058	9.828
			M-X-5	9.305	1.391	97.408		20.19	1.20144	77.55
			average	2.1512	0.38308	40.2413		18.384	2.01011	31.1843
F6	-42.1781	surface	S-B-1	2.3751	0.164	15.792		18.08	3.73935
			S-B-2	3.8785	0.6218	32.251		9.73		34.71
			S-B-3	2.1952	0.1517	36.353		25.29	3.80072
			S-B-4	2.3742	0.1423	195.33		9.35		12.88
			S-B-5	2.5966	0.1622	85.321		16.23	1.54079	14.84
			average	2.68392	0.2484	73.0094		15.736	3.02696	20.81
		deep	S-X-1	2.3351	0.1534	28.005		18.24
			S-X-2	2.0395	0.1212	12.325		17.5	4.99206	10.83
			S-X-3	2.1681	0.1529	83.252		28.92	2.28448	12.12
			S-X-4	1.9659	0.1262	15.443		9.83	4.81155
			S-X-5	1.8692	0.1258	31.126		26.65	5.3639	12.32
			average	2.07556	0.1359	34.0302		20.228	4.363	11.7567
DATA measured by Environmental Protection Bureau of Baoding
May
	distance to the estuary		CH4+ mg/l	TP mg/l	COD mg/l
	-63		0.137	0.01	13
	-53.3		0.123	0.06	21
	-67.2		0.175	0.01	11
	-56		4.95	0.34	26
	-58		0.103	0.04	14
	-43.87		5.7	0.39	27
	-35.8		2.32	0.08	22
	-30.4455		0.037	0.11	23
	-22		0.534	0.1	17
	-33.6		0.209	0.16	31
July
	-63		0.062	0.01	8
	-53.2		0.025	0.12	14
	-53.3		0.026	0.36	37
	-56		0.027	0.05	9
	-58		0.025	0.1	12
	-43.87		0.429	0.21	12
	-35.8		0.874	0.22	12
	-30.4455		1.12	0.22	23
	-22		0.66	0.17	24
	-67.2		0.025	0.03	9
	-33.6		0.039	0.24	32
October
	-63		0.06	0.06	16
	-53.2		0.537	0.12	12
	-53.3		0.256	0.2	22
	-56		0.115	0.09	9
	-58		0.25	0.1	17
	-43.87		1.04	0.1	8
	-51.8		0.074	0.05	11
	-67.2		0.262	0.04	13
	-22		0.42	0.13	15
	-35.8		0.212	0.09	12

## Sheet: Sheet2
Sample site	distance to the estuary
F1	-62.5034
F2	-64.516
F3	-61.7039
F4	-60.1516
F5	-51.1159
F6	-42.1781
F7	-42.1928
F8	-41.812
F9	-30.4455
F10	-23.9455
F11	-15.8913
F12	-6.74795
F13	-9.45592
F14	0
